# Supplementary material
Source: MDPI journal article supplement (https://www.mdpi.com/2076-3417/13/1/43)
Supplement: s1 [file s1]

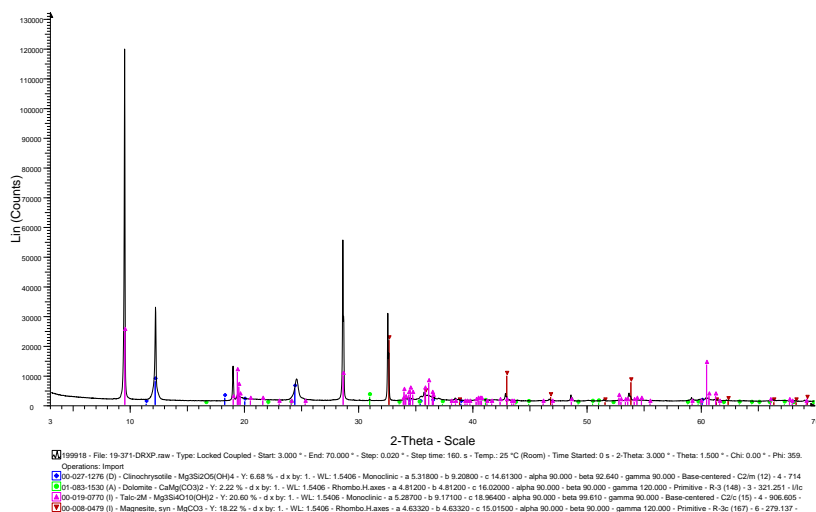

**Supplementary Materials Figure S1:** XRPD of sample M-17, whole rock before ablation, where peaks of a talc, serpentine (clinochrysotile), magnesite and dolomite.

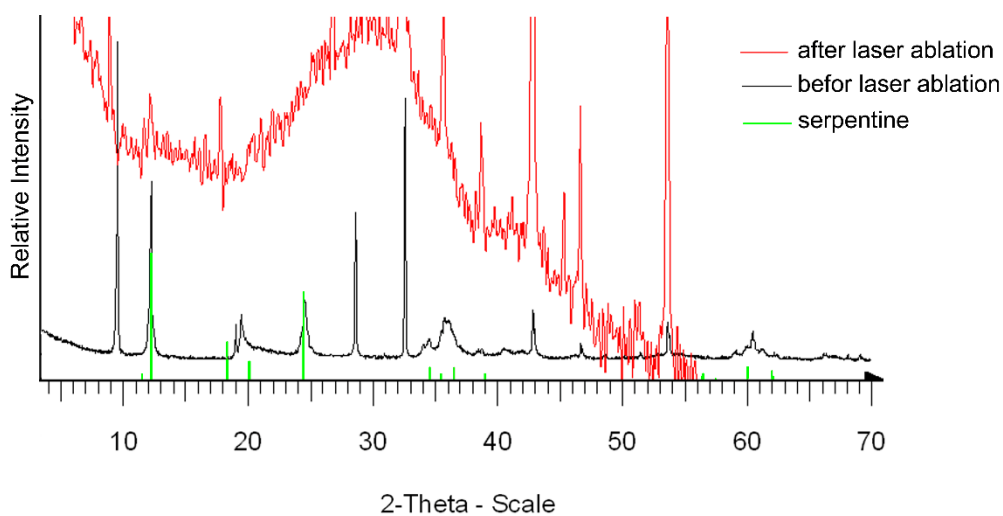

**Supplementary Materials Figure S2:** XRPD of raw M17 sample before and after laser ablation.
